# Supplementary material
Source: PubMed Central journal article supplement (PMC11028979)
Supplement: 262_2014_1612_MOESM1_ESM.pdf [file 262_2014_1612_MOESM1_ESM.pdf]

Cancer Immunology, Immunotherapy (submitted in 2014) -- Leah Novinger et al.  
Supplemental Figures and Tables

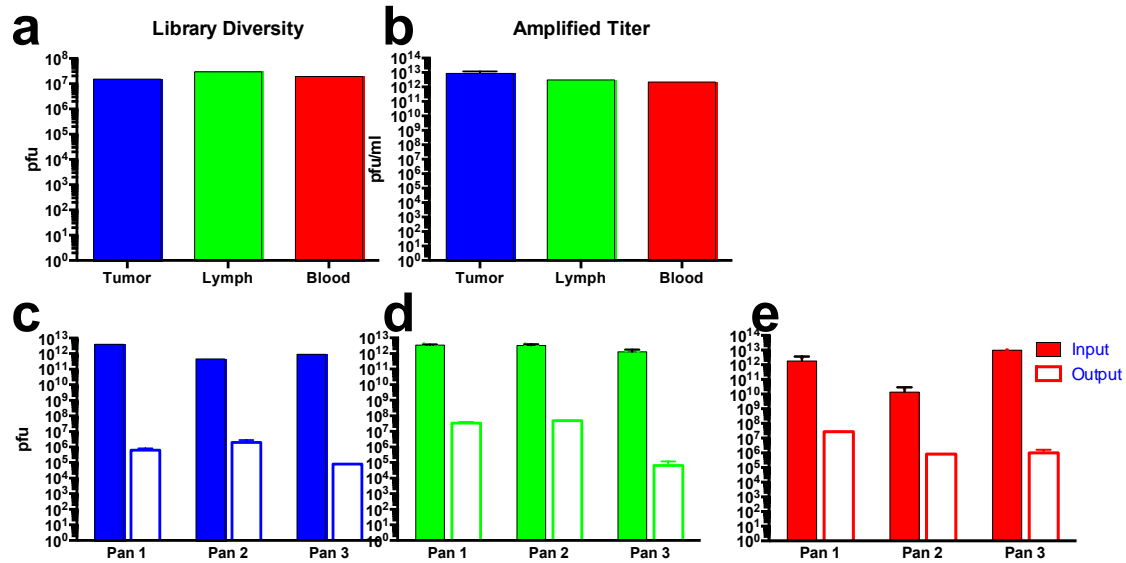

Supplemental Figure 1. Comparison of three scFv libraries derived from the same breast cancer patient. Library diversity (**a**) and amplified size (**b**) were compared for tumor (blue), axillary lymph node (green), and blood (red) libraries created from the same breast cancer patient. Library diversity was based on the overall number of transformants. Library size was the biological titer of the library calculated following amplification. Input (solid bars) and output phage (open bars) from each round of panning are shown for tumor, lymph node, and blood libraries (**c-e**).

Supplemental Table 1. Summary of pre-enrichment scFv sequenced for heavy chain genetic analysis. Only unique sequences were included in the analysis; duplicate, short, poor quality, unidentifiable (no results) and unknown sequences were removed from the analysis.

| Heavy Chain Sequences |                  |           |       |               |            |         |       |
|-----------------------|------------------|-----------|-------|---------------|------------|---------|-------|
| Source                | Used in Analysis | Discard   |       |               |            |         | Total |
|                       |                  | Duplicate | Short | Poor Sequence | No Results | Unknown |       |
| Tumor                 | 35               | 0         | 0     | 7             | 4          | 1       | 47    |
| LN                    | 56               | 5         | 0     | 16            | 26         | 2       | 105   |
| Blood                 | 45               | 5         | 0     | 2             | 8          | 4       | 64    |

Supplemental Table 2. Summary of pre-enrichment scFv sequenced for light chain genetic analysis. Only unique sequences were included in the analysis; duplicate, short, poor quality, unidentifiable (no results) and unknown sequences were removed from the analysis.

| Light Chain Sequences |                  |           |       |               |            |         |       |
|-----------------------|------------------|-----------|-------|---------------|------------|---------|-------|
| Source                | Used in Analysis | Discard   |       |               |            |         | Total |
|                       |                  | Duplicate | Short | Poor Sequence | No Results | Unknown |       |
| Tumor                 | 36               | 1         | 0     | 2             | 1          | 2       | 42    |
| LN                    | 72               | 1         | 0     | 10            | 10         | 0       | 93    |
| Blood                 | 44               | 2         | 0     | 12            | 1          | 0       | 59    |

Supplemental Table 3. Summary of post-enrichment scFv sequenced for heavy chain genetic analysis. Only unique sequences were included in the analysis; duplicate, short, poor quality, unidentifiable (no results) and unknown sequences were removed from the analysis.

| Heavy Chain Sequences |                  |           |       |               |            |         |       |
|-----------------------|------------------|-----------|-------|---------------|------------|---------|-------|
| Source                | Used in Analysis | Discard   |       |               |            |         | Total |
|                       |                  | Duplicate | Short | Poor Sequence | No Results | Unknown |       |
| Tumor                 | 27               | 3         | 112   | 17            | 20         | 11      | 190   |
| LN                    | 94               | 7         | 31    | 18            | 36         | 4       | 190   |
| Blood                 | 3                | 85        | 1     | 0             | 4          | 0       | 93    |

Supplemental Table 4. Summary of post-enrichment scFv sequenced for light chain genetic analysis. Only unique sequences were included in the analysis; duplicate, short, poor quality, unidentifiable (no results) and unknown sequences were removed from the analysis.

| Light Chain Sequences |                  |           |       |               |            |         |       |
|-----------------------|------------------|-----------|-------|---------------|------------|---------|-------|
| Source                | Used in Analysis | Discard   |       |               |            |         | Total |
|                       |                  | Duplicate | Short | Poor Sequence | No Results | Unknown |       |
| Tumor                 | 31               | 3         | 110   | 15            | 20         | 11      | 190   |
| LN                    | 131              | 7         | 5     | 11            | 32         | 4       | 190   |
| Blood                 | 4                | 85        | 0     | 0             | 4          | 0       | 93    |

Supplemental Table 5. Summary of heavy chain variable gene segment frequency in tumor, lymph node, or blood libraries. **(a)** Frequency of each gene segment in the library based on total number of gene segments analyzed (indicated in first column for each library). The frequency is reported with the exact confidence interval. **(b)** Overall P values for each segment are reported. If the overall p value < 0.05, the exact p values for pairwise comparisons are shown under the overall p value.

| a. Source          | VH1               | VH2             | VH3              | VH4              | VH5              | VH6              |
|--------------------|-------------------|-----------------|------------------|------------------|------------------|------------------|
| Tumor<br>n=35      | 14%<br>(5% - 30%) | 0%<br>(0%-10%)  | 63%<br>(45%-79%) | 23%<br>(10%-40%) | 0%<br>(0% - 10%) | 0%<br>(0% - 10%) |
| Lymph Node<br>n=56 | 9%<br>(3% - 20%)  | 0%<br>(0% - 6%) | 54%<br>(40%-67%) | 25%<br>(14%-38%) | 11%<br>(4%-22%)  | 2%<br>(0%-10%)   |
| Blood<br>n=45      | 13%<br>(5% - 7%)  | 0%<br>(0% - 8%) | 78%<br>(63%-89%) | 9%<br>(2%-21%)   | 0%<br>(0% - 8%)  | 0%<br>(0% - 8%)  |

| b. Statistical Analysis | VH1    | VH2   | VH3    | VH4    | VH5    | VH6    |
|-------------------------|--------|-------|--------|--------|--------|--------|
| Overall p-value         | 0.6550 | 1.000 | 0.0432 | 0.1052 | 0.0095 | 1.0000 |
| T vs LN                 |        |       | 0.5140 |        | 0.0784 |        |
| LN vs B                 |        |       | 0.0131 |        | 0.0320 |        |
| B vs T                  |        |       | 0.2128 |        | 1.0000 |        |

Supplemental Table 6. Summary of heavy chain joining gene segment frequency in tumor (T), lymph node (LN), or blood (B) libraries. **(a)** Frequency of each gene segment in the library based on total number of gene segments analyzed (indicated in first column for each library). The frequency is reported with the exact confidence interval. **(b)** Overall P values for each segment are reported. If the overall p value < 0.05, the exact p values for pairwise comparisons are shown under the overall p value.

| a. Source          | JH1             | JH2             | JH3              | JH4              | JH5            | JH6              |
|--------------------|-----------------|-----------------|------------------|------------------|----------------|------------------|
| Tumor<br>n=35      | 9%<br>(2%-23%)  | 3%<br>(0%-15%)  | 26%<br>(14%-43%) | 43%<br>(26%-61%) | 6%<br>(1%-19%) | 14%<br>(5%-30%)  |
| Lymph Node<br>n=56 | 0%<br>(0% - 6%) | 2%<br>(0%-10%)  | 34%<br>(22%-48%) | 27%<br>(16%-40%) | 9%<br>(3% -0%) | 29%<br>(17%-42%) |
| Blood<br>n=45      | 0%<br>(0% - 8%) | 0%<br>(0% - 8%) | 31%<br>(18%-47%) | 53%<br>(38%-68%) | 4%<br>(0%-15%) | 11%<br>(3%-24%)  |

| b. Statistical Analysis | JH1    | JH2    | JH3    | JH4    | JH5    | JH6    |
|-------------------------|--------|--------|--------|--------|--------|--------|
| Overall p-value         | 0.0160 | 0.7255 | 0.7294 | 0.0251 | 0.6859 | 0.0565 |
| T vs LN                 | 0.0539 |        |        | 0.1685 |        |        |
| LN vs B                 | 1.0000 |        |        | 0.3766 |        |        |
| B vs T                  | 0.0797 |        |        | 0.0079 |        |        |

Supplemental Table 7. Summary of  $\kappa$  light chain variable gene segment frequency in tumor (T), lymph node (LN), or blood (B) libraries. **(a)** Frequency of each gene segment in the library based on total number of gene segments analyzed (indicated in first column for each library). The frequency is reported with the exact confidence interval. **(b)** Overall P values for each segment are reported. No significant differences in gene frequency were identified among these populations.

| a. Source          | V $\kappa$ 1       | V $\kappa$ 2     | V $\kappa$ 3       | V $\kappa$ 4       | V $\kappa$ 5     |
|--------------------|--------------------|------------------|--------------------|--------------------|------------------|
| Tumor<br>n=24      | 33%<br>(16% - 55%) | 0%<br>(0% - 14%) | 17%<br>(5% - 37%)  | 50%<br>(29% - 71%) | 0%<br>(0% - 14%) |
| Lymph Node<br>n=39 | 23%<br>(11% - 40%) | 0%<br>(0% - 9%)  | 38%<br>(23% - 55%) | 38%<br>(23% - 55%) | 0%<br>(0% - 9%)  |
| Blood<br>n=38      | 21%<br>(10% - 37%) | 5%<br>(0% - 18%) | 34%<br>(18% - 49%) | 37%<br>(22% - 54%) | 3%<br>(0% - 14%) |

| b. Statistic Analysis | V $\kappa$ 1 | V $\kappa$ 2 | V $\kappa$ 3 | V $\kappa$ 4 | V $\kappa$ 5 |
|-----------------------|--------------|--------------|--------------|--------------|--------------|
| Overall p-value       | 0.5672       | 0.1939       | 0.1760       | 0.5571       | 0.6139       |

Supplemental Table 8. Summary of  $\lambda$  light chain variable gene segment frequency in tumor (T), lymph node (LN), or blood (B) libraries. **(a)** Frequency of each gene segment in the library based on total number of gene segments analyzed (indicated in first column for each library). The frequency is reported with the exact confidence interval. **(b)** Overall P values for each segment are reported. No significant differences in gene frequency were identified among these populations.

| a. Source          | V $\lambda$ 1      | V $\lambda$ 2      | V $\lambda$ 3      | V $\lambda$ 4     | V $\lambda$ 6    | V $\lambda$ 8    | V $\lambda$ 9     |
|--------------------|--------------------|--------------------|--------------------|-------------------|------------------|------------------|-------------------|
| Tumor<br>n=12      | 17%<br>(2% - 48%)  | 25%<br>(5% - 57%)  | 25%<br>(5% - 57%)  | 17%<br>(2% - 48%) | 8%<br>(0% - 38%) | 0%<br>(0% - 26%) | 8%<br>(0% - 38%)  |
| Lymph Node<br>n=33 | 27%<br>(13% - 46%) | 36%<br>(20% - 55%) | 27%<br>(13% - 46%) | 0%<br>(0% - 11%)  | 6%<br>(0% - 20%) | 3%<br>(0% - 16%) | 0%<br>(0% - 11%)  |
| Blood<br>N=6       | 50%<br>(12% - 88%) | 33%<br>(4% - 78%)  | 0%<br>(0% - 46%)   | 0%<br>(0% - 46%)  | 0%<br>(0% - 46%) | 0%<br>(0% - 46%) | 17%<br>(0% - 64%) |

| b. Statistical Analysis | V $\lambda$ 1 | V $\lambda$ 2 | V $\lambda$ 3 | V $\lambda$ 4 | V $\lambda$ 6 | V $\lambda$ 8 | V $\lambda$ 9 |
|-------------------------|---------------|---------------|---------------|---------------|---------------|---------------|---------------|
| Overall p-value         | 0.3709        | 0.9027        | 0.4812        | 0.0635        | 1.0000        | 1.0000        | 1.0000        |

Supplemental Table 9. Distribution of nonclonal independent and clonal heavy chain sequences in each library. This table shows in tabular form the number of individual heavy chains shown in the Venn diagram in Figure 2. Clonal heavy chains shared a junctional region with another heavy chain, whereas nonclonal independent heavy chains did not.

|                                    | Tumor Library | Lymph Node Library | Blood Library |
|------------------------------------|---------------|--------------------|---------------|
| Nonclonal Independent Heavy Chains | 29 (72.5%)    | 45 (71.4%)         | 31 (68.9%)    |
| Clonal Heavy Chains                | 11(27.5%)     | 18 (28.6%)         | 14 (31.1%)    |

Supplemental Table 10. Distribution of nonclonal independent and clonal light chain sequences in each library. This table shows in tabular form the numbers of individual light chains shown in the Venn diagram in Figure 3. Clonal light chains shared a junctional region with another light chain, whereas nonclonal light chains did not.

|                                    | Tumor library | Lymph node library | Blood library |
|------------------------------------|---------------|--------------------|---------------|
| Nonclonal Independent Light Chains | 28 (73.7%)    | 49 (75.4%)         | 39 (90.7%)    |
| Clonal Light Chains                | 10 (26.3%)    | 16 (24.6%)         | 14 (9.3%)     |

Supplemental Table 11. Number of groups of clones with heavy chain sequences shared between libraries. This table shows in tabular form the clonal groups shown in the overlapping circle portions of the Venn diagram in Figure 2. The observed number of groups of heavy chain sequences shared between the tumor and lymph node libraries was significantly more than expected by chance using a chi-square goodness of fit test [chi square (df=2) = 12.00, exact p-value and point probability = 0.004].

|          | Tumor and lymph node libraries | Tumor and blood libraries | Lymph node and blood libraries |
|----------|--------------------------------|---------------------------|--------------------------------|
| Observed | 6                              | 0                         | 0                              |
| Expected | 2                              | 2                         | 2                              |

Supplemental Table 12. Number of groups of clones with light chain sequences shared between libraries. This table shows in tabular form the clonal groups shown in the Venn diagram in Figure 3. The observed number of groups of light chain sequences shared between the tumor and lymph node libraries (first row) was significantly more than expected by chance (second row) using a chi-square goodness of fit test [chi square (df=2) = 9.997, exact p-value and point probability = 0.01].

|          | Tumor and lymph node libraries | Tumor and blood libraries | Lymph node and blood libraries |
|----------|--------------------------------|---------------------------|--------------------------------|
| Observed | 5                              | 0                         | 0                              |
| Expected | 1.67                           | 1.67                      | 1.67                           |

Supplemental Table 13. Clonal heavy and light chain groups identified among scFv selected from each library after enrichment for binding to autologous tumor lysates.

| Type of Group | Tumor Library | Lymph Node | Blood Library |
|---------------|---------------|------------|---------------|
| Heavy Chain   | 0             | 9          | 0             |
| Light Chain   | 1             | 9          | 0             |

Supplemental Table 14. Clonal heavy and light chain groups shared between scFv from different libraries after enrichment for binding to autologous tumor lysates.

| Type of Group | Tumor and Lymph Node Libraries | Tumor and Blood Libraries | Lymph Node and Blood Libraries |
|---------------|--------------------------------|---------------------------|--------------------------------|
| Heavy chain   | 5                              | 0                         | 0                              |
| Light chain   | 5                              | 0                         | 0                              |
